# Supplementary material for: Polyaniline–niobium oxide nanohybrids with photocatalytic activity under visible light irradiation
Source: Royal Society of Chemistry journal article supplement (doi:10.1039/d0nj06215d), 2021-01-01
Supplement: d0nj06215d1.pdf [file d0nj06215d1.pdf]

# **POLYANILINE-NIOBIUM OXIDE NANOHYBRIDS WITH PHOTOCATALYTIC ACTIVITY UNDER VISIBLE LIGHT IRRADIATION**

*Marconi C. Santos <sup>a</sup>, Marcos A. Bizeto <sup>a</sup> and Fernanda F. Camilo <sup>a\*</sup>*

*<sup>a</sup>Departamento de Química, Instituto de Ciências Ambientais, Químicas e  
Farmacêuticas, Universidade Federal de São Paulo, Diadema – SP, Brazil*

\*ffcamilo@unifesp.br

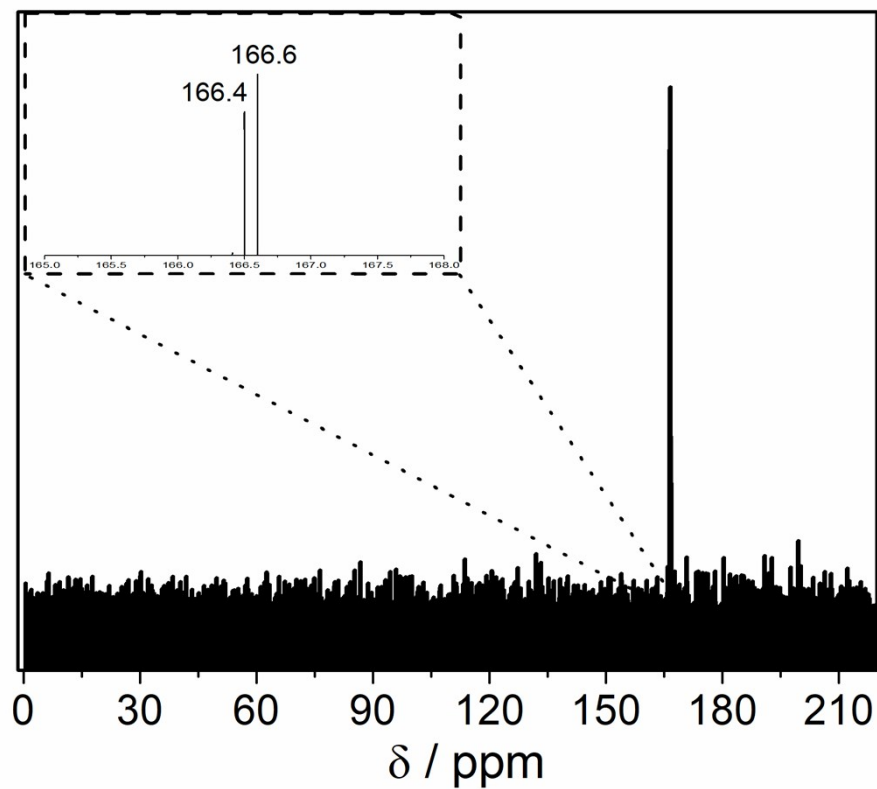

**Figura 1S -  $^{13}\text{C}$  NMR spectrum of  $(\text{NH}_4)[\text{Nb}(\text{C}_2\text{O}_4)(\text{O}_2)_2(\text{H}_2\text{O})_2]$  (125 MHz in  $\text{D}_2\text{O}$ ). Inset: 165– 168 ppm region, evidencing the C=O of the oxalates groups**

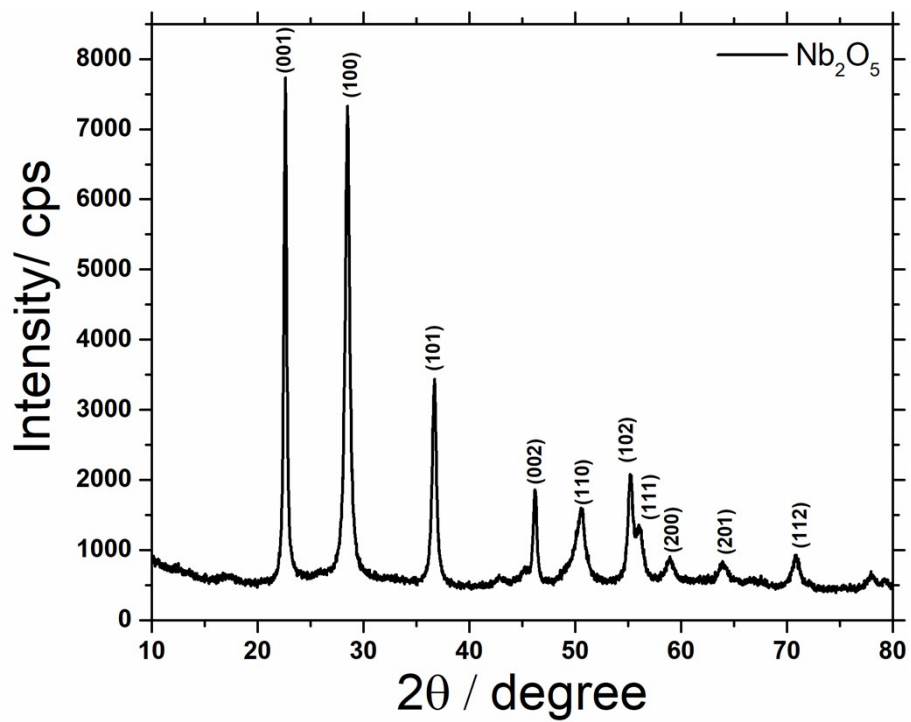

**Figure 2S – XRD pattern of the residue of the TG experiment obtained for the PANI\_Nb\_2 sample**

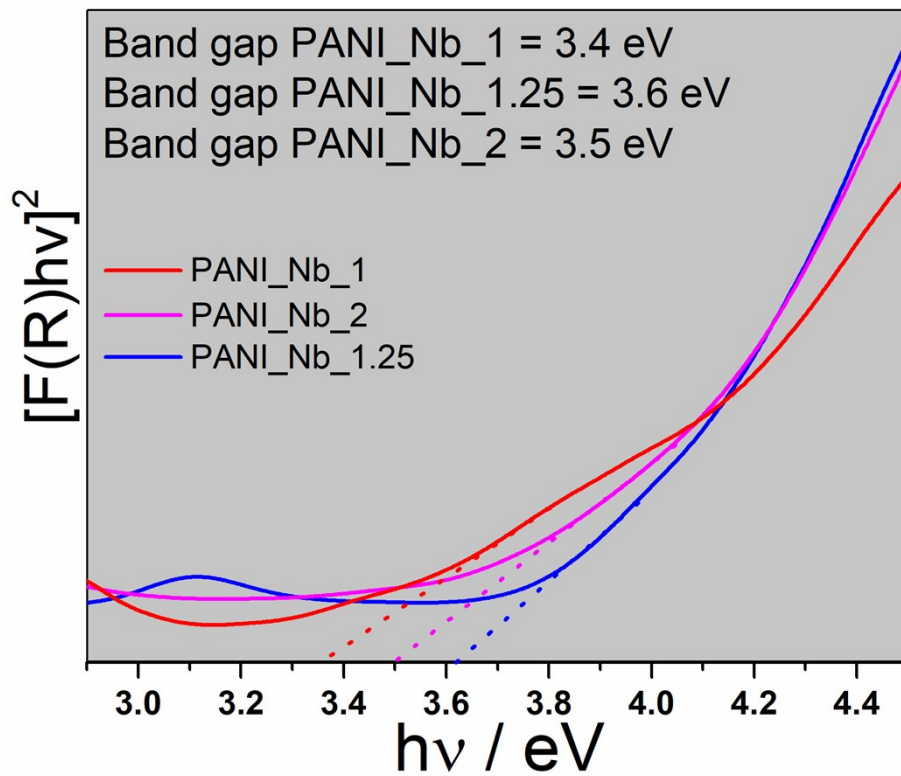

Figure 3S – Diffuse reflectance spectra in the UV-visible range of PANI\_Nb\_x samples

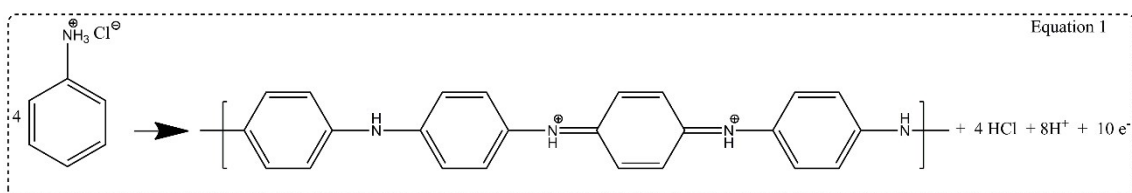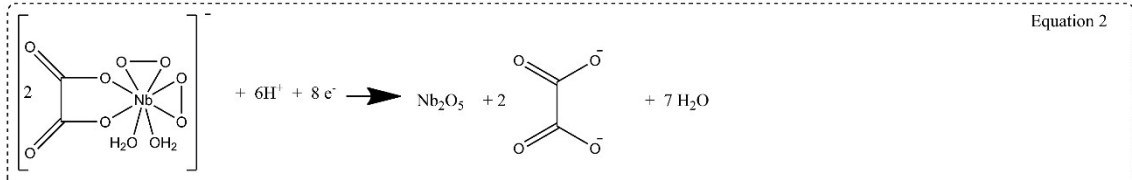

Global Equation = Eq (1) \* 1.25 + Eq (2)

**Figure 4S – The reduction and oxidation semi-reactions for between anilinium chloride and peroxyoxalate niobium**

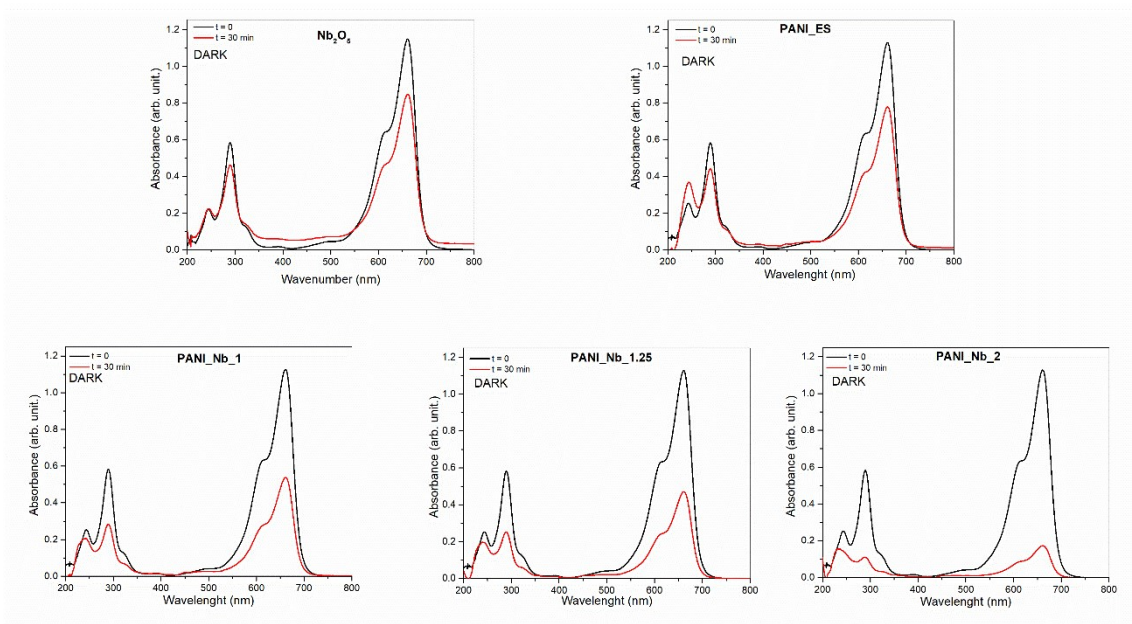

**Figure 5S: UV/Vis absorption spectra of aqueous MB in the presence of the hybrids of PANI and  $\text{Nb}_2\text{O}_5$  in dark conditions**

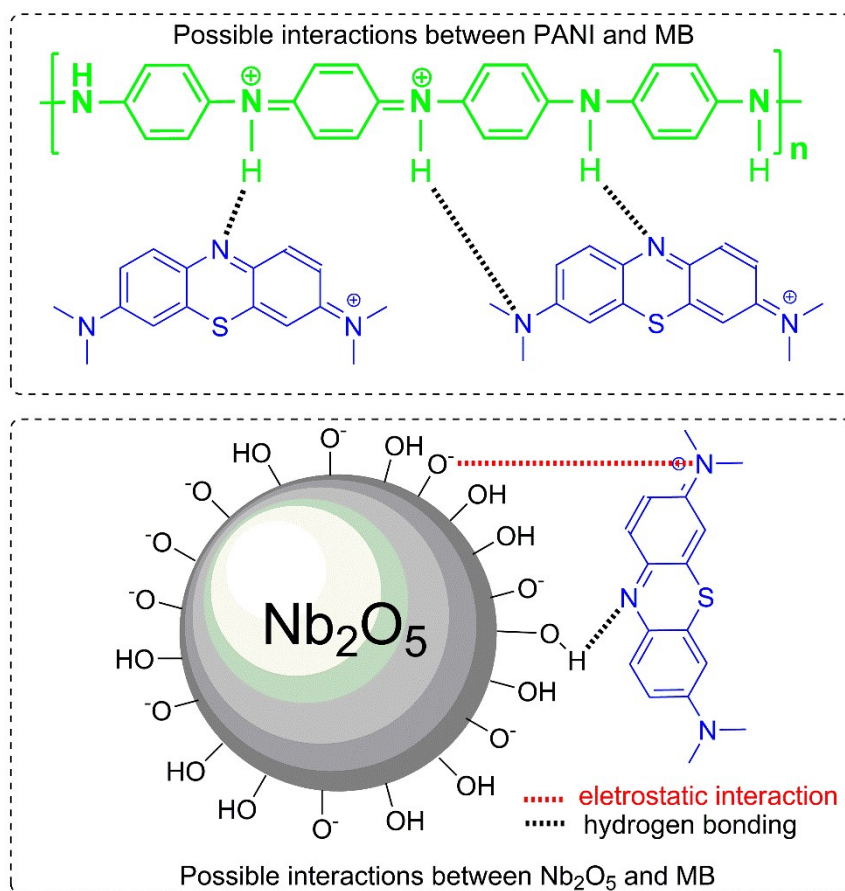

Figure 6S: Possible interactions between  $\text{Nb}_2\text{O}_5$ , PANI and MB

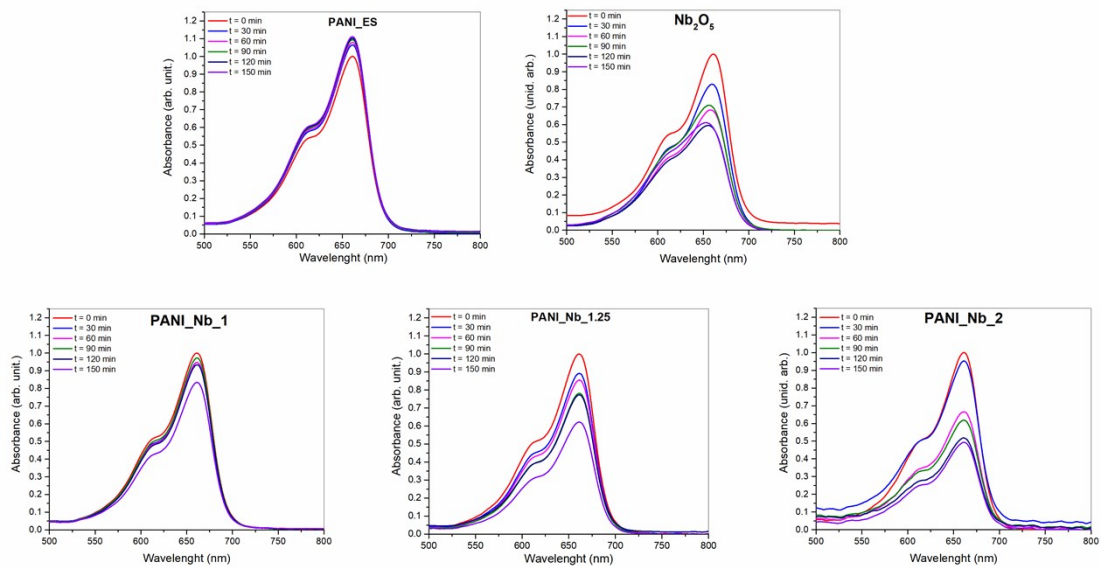

**Figure 7S: UV/Vis absorption spectra of aqueous MB in the presence of the hybrids of PANI and Nb<sub>2</sub>O<sub>5</sub> under visible light**



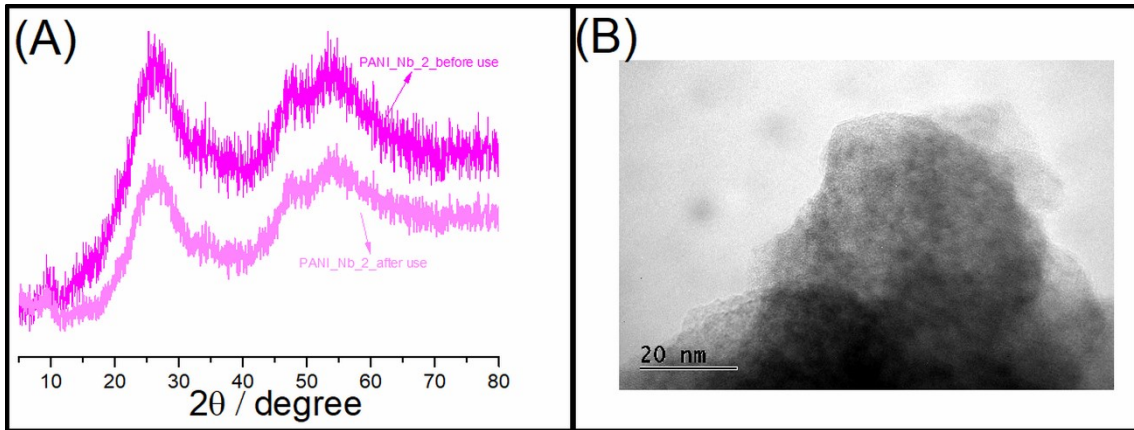

Figure 8S: DRX (A) and TEM image (B) of the PANI\_Nb\_2 sample after its usage in the discoloration assays
